# Supplementary material
Source: Springer Nature journal article supplement (https://www.springermedizin.de/resource/supplementary/12911_2012_583_MOESM1_ESM.pdf/9525848)
Supplement: MOESM1 [file 9525848]

- Strategic leadership
- Learning environment

- Culture of information use
- Capacity for implementation

Stewardship

Organisational

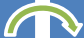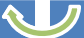

Financial

Technological

- Sustainable funding
- Cost effectiveness

- Useability
- Interoperability
- Privacy and security
